# Supplementary material
Source: PubMed Central journal article supplement (PMC7304961)
Supplement: mmc1.pdf [file mmc1.pdf]

# THE LANCET Infectious Diseases

## Supplementary webappendix

This webappendix formed part of the original submission. We post it as supplied by the authors.

Supplement to: Sardanelli F, Cozzi A, Monfardini L, et al. Association of mediastinal lymphadenopathy with COVID-19 prognosis. *Lancet Infect Dis* 2020; published online June 19. [https://doi.org/10.1016/S1473-3099\(20\)30521-1](https://doi.org/10.1016/S1473-3099(20)30521-1).

**Table 1: Demographic, clinical, laboratory, and CT findings on admission**

|                                                      | Patients with lymphadenopathies (n=76) | Patients without lymphadenopathies (n=334) | p value |
|------------------------------------------------------|----------------------------------------|--------------------------------------------|---------|
| <b>Demographic and clinical findings</b>             |                                        |                                            |         |
| Sex                                                  | 59 M / 17 F                            | 229 M / 105 F                              | 0.119   |
| Median age (years)                                   | 70 (IQR 63–79)                         | 68 (IQR 56–78)                             | 0.150   |
| Any cancer history                                   | 3/36                                   | 25/289                                     | 0.949   |
| Non-invasive ventilation during hospitalization      | 45/76                                  | 154/334                                    | 0.039   |
| Intensive care unit admission during hospitalization | 15/76 (20%, 95% CI 12–31)              | 45/334 (13%, 95% CI 10–17)                 | 0.163   |
| Median days of hospitalization                       | 7 (IQR 5–13)                           | 8 (IQR 4–14)                               | 0.934   |
| Death                                                | 37/76 (49%, 95% CI 37–60)              | 99/334 (30%, 95% CI 25–35)                 | 0.001   |
| <b>Laboratory findings</b>                           |                                        |                                            |         |
| Median P <sub>a</sub> O <sub>2</sub> (%)             | 61 (IQR 49–70) <sup>a</sup>            | 63 (IQR 53–73) <sup>b</sup>                | 0.060   |
| White blood cell count (×10 <sup>3</sup> per μl)     | 7.9 (IQR 5.1–9.5) <sup>c</sup>         | 6.3 (IQR 4.7–8.8) <sup>d</sup>             | 0.132   |
| Lymphocyte count (×10 <sup>3</sup> per μl)           | 1.0 (IQR 0.7–1.3) <sup>c</sup>         | 1.0 (IQR 0.7–1.4) <sup>d</sup>             | 0.747   |
| <b>CT features</b>                                   |                                        |                                            |         |
| Median parenchymal involvement <sup>e</sup>          | 2 (IQR 1–3)                            | 2 (IQR 1–2)                                | 0.008   |
| Median disease progression <sup>e</sup>              | 3 (IQR 2–3)                            | 2 (IQR 2–3)                                | 0.073   |
| Bilateral lung involvement                           | 71/76                                  | 314/334                                    | 0.846   |
| Pleural effusion                                     | 9/76                                   | 18/334                                     | 0.041   |
| Crazy paving pattern                                 | 33/76                                  | 73/334                                     | <0.001  |

All data were acquired on admission unless otherwise specified; p values were calculated with the Mann–Whitney *U* test or the  $\chi^2$  test, as appropriate.

<sup>a</sup> data available for 66 patients

<sup>b</sup> data available for 307 patients

<sup>c</sup> data available for 36 patients

<sup>d</sup> data available for 293 patients

<sup>e</sup> according to the classification by Bernheim and colleagues<sup>4</sup>
